# Supplementary material for: Prophylactic Therapy with Human Amniotic Fluid Stem Cells Improves Long-Term Cognitive Impairment in Rat Neonatal Sepsis Survivors
Source: MDPI journal article supplement (doi:10.3390/ijms21249590), 2020-12-16
Supplement: s1 [file s1]

Fig. S1

A

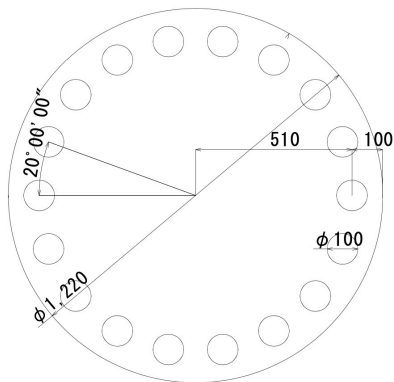

B

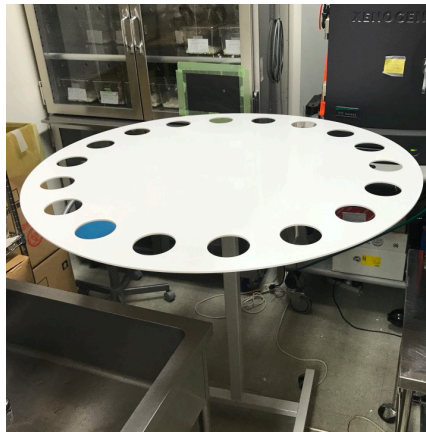

C

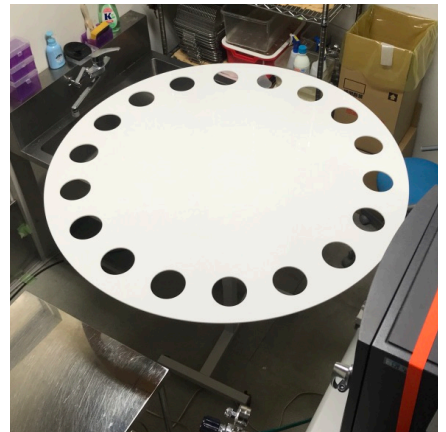

**Fig. S1.** Blueprint used to cut out from an acrylic sheet (A). A view of the Barnes maze set up at the site of the experiment. There are some spatial recognition clues for rats around the Barnes maze (B, C).
